# Supplementary material
Source: PubMed Central journal article supplement (PMC6354911)

Supplementary Figure 4

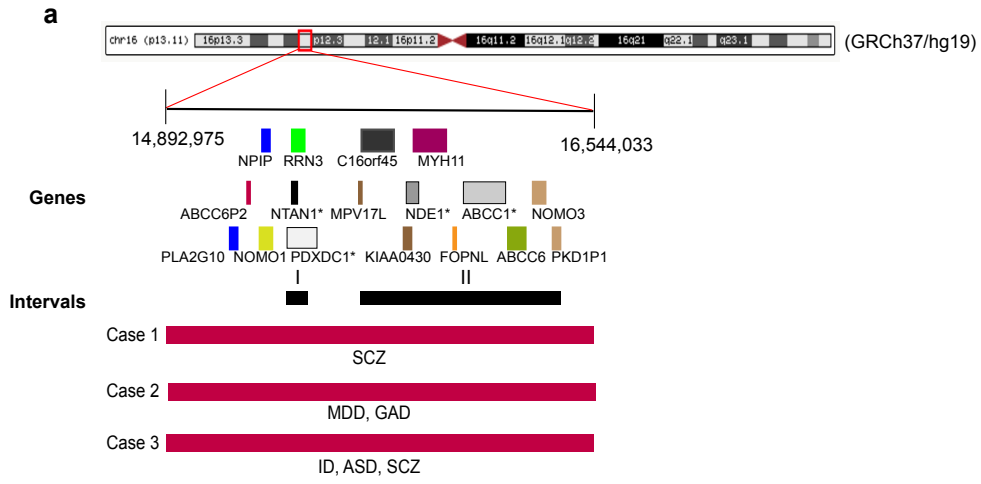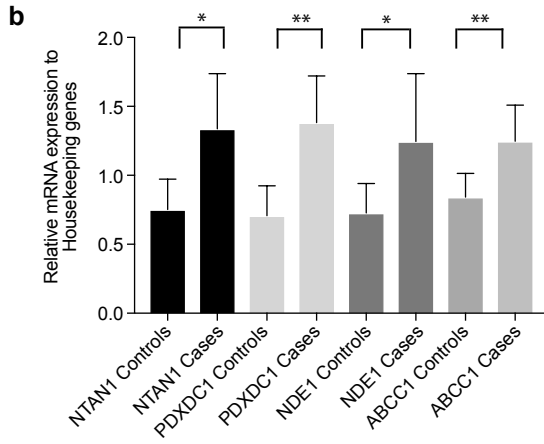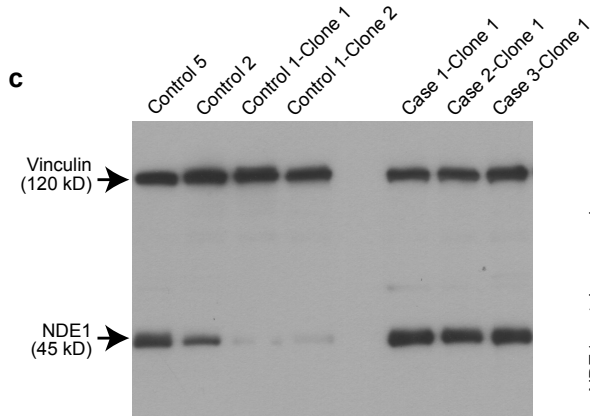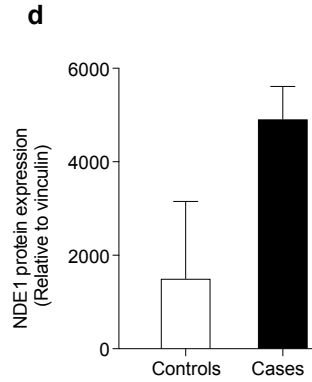

Supplement: NIHMS79985-supplement-Supplementary_Figure_4.pdf [file NIHMS79985-supplement-Supplementary_Figure_4.pdf]
