# Supplementary material
Source: PubMed Central journal article supplement (PMC6354911)
Supplement: NIHMS79985-supplement-Supplementary_Table_3.pdf [file NIHMS79985-supplement-Supplementary_Table_3.pdf]

| Cell Line | NPC proliferation studies (Fig 2a) | Organoid studies (Fig 2f-k & Fig 4f-g) | RNA sequencing studies   | Proteomics (RPPA & WB)(Fig 4b-e) | NFκB activator screen (Fig 5f-g) | Lentivirus RELA expression (Fig 5h-i) |
|-----------|------------------------------------|----------------------------------------|--------------------------|----------------------------------|----------------------------------|---------------------------------------|
| Case 1-C1 | ✓                                  | -                                      | -                        | -                                | ✓                                | ✓                                     |
| Case 1-C2 | ✓                                  | ✓                                      | ✓                        | ✓                                | ✓                                | -                                     |
| Case 1-C3 | -                                  | -                                      | ✓                        | ✓                                | -                                | -                                     |
| Case 2-C1 | ✓                                  | -                                      | -                        | ✓                                | ✓                                | ✓                                     |
| Case 2-C2 | ✓                                  | ✓                                      | ✓                        | ✓                                | -                                | -                                     |
| Case 3-C1 | ✓                                  | ✓                                      | -                        | ✓                                | -                                | -                                     |
| Case 3-C2 | ✓                                  | ✓                                      | ✓                        | ✓                                | ✓                                | -                                     |
| CTL1-C1   | ✓                                  | ✓                                      | ✓                        | ✓                                | -                                | -                                     |
| CTL1-C2   | -                                  | -                                      | ✓<br>(2 NPC derivations) | ✓                                | -                                | -                                     |
| CTL2      | ✓                                  | ✓                                      | ✓                        | ✓                                | -                                | -                                     |
| CTL3      | ✓                                  | ✓                                      | ✓<br>(2 NPC derivations) | ✓                                | -                                | -                                     |
| CTL4      | -                                  | -                                      | ✓                        | -                                | -                                | -                                     |
| CTL5      | ✓                                  | -                                      | ✓                        | ✓                                | -                                | -                                     |

Supplementary Table S3: Cell lines used in the various experiments of this study
